# Supplementary material for: A standardized set of pNX vectors for enhanced soluble expression of recombinant proteins in E. coli using small fusion tags
Source: Research Square preprint supplement (doi:10.21203/rs.3.rs-7875802/v1), 2025-11-02
Supplement: Supplementary file 1 [file b640a0f63e75e07f85adcfb2.docx]

**Table S1 Primers used in this study**

| **Primers** | **Sequences（5’-3’）** |
| --- | --- |
| SUMO P1 | TAAGAAGGAGATATACCATGGGTTCGGACTCAGAAG |
| SUMO P2 | CTGGCGGACCACCGGTACCACCACCAATCTGTTCTCTG |
| SUMO P3 | GAAATACAGGTTTTCACCGCCTGGCGGACCACCGG |
| SUMO P4 | GTGGTGGTGGTGGTGGCCCTGGAAATACAGGTTTTC |
| SUMO P5 | CGGATCCCATATGGTGGTGGTGGTGGTGGTGGCC |
| SUMO P6 | CGGAGCTCGAATTCGGATCCCATATGGTGGTGGTGG |
| SmbP P1 | TAAGAAGGAGATATACCATGGGTAGCGGACATACTGCT |
| SmbP P2 | CCTGGCGGACCACCGGTACCGTGCGATTTATGTTC |
| GB1 P1 | TAAGAAGGAGATATACCATGGGTACTTACAAATTAATCC |
| GB1 P2 | CCTGGCGGACCACCGGTACCTTCAGTAACTGTAAAGGTC |
| Fh8 P1 | TAAGAAGGAGATATACCATGGGTCCTAGTGTTCAAGAGG |
| Fh8 P2 | CCTGGCGGACCACCGGTACCTGATGACAAAATCGAAACG |
| LD P1 | CATGCCATGGGTATGGCTATCGAAATCAAAGTAC |
| LD P2 | CGGGGTACCCGCAGGAGCTGCCGCAGGCGC |
| ACP P1 | CATGCCATGGGTATGGTGAGCACTATCGAAG |
| ACP P2 | CGGGGTACCCGCCTGGTGGCCGTTGATG |
| TolA P1 | CATGCCATGGGTAGCAGCAACAATGGCGCATC |
| TolA P2 | CGGGGTACCCGGTTTGAAGTCCAATGGCG |
| TrxA P1 | CATGCCATGGTGAGCGATAAAATTATTCACC |
| TrxA P2 | CGGGGTACCGGCCAGGTTAGCGTCGAGG |
| BCCP P1 | CATGCCATGGTGGAAGCGCCAGCAGCAG |
| BCCP P2 | CCTGGCGGACCACCGGTACCCTCGATGACGACCAGCGG |
| eGFP P1 | CGCCATATGGTGAGCAAGGGCGAGGAG |
| eGFP P2 | CCCAAGCTTCTTGTACAGCTCGTCCATG |
| *Ec*FabG P1 | CGCCATATGAATTTTGAAGGAAAAATCGCACTGG |
| *Ec*FabG P2 | CCCAAGCTTGACCATGTACATCCCGCC |
| *Xcc*XanA2 F | CGCCATATGGTGTGCCAAGCGCTCCATGCTT |
| *Xcc*XanA2 R | CCCAAGCTTGCTACTGAGCAACCCCAACAC |
| *Xcc*XanL F | CGCCATATGTTGACGGCCACCATCGAAGG |
| *Xcc*XanL R | CCCAAGCTTTGGCTGCACCTCCACCTGC |

**Table S2 Bacterial strains and plasmids used in this study**

| Strains or plasmids | Genotype or description | Source or reference |
| --- | --- | --- |
| Strains |  |  |
| DH5α | F- *deoR* *endA1* *gyrA96* *hsdR17*(rK-mK+) *recA1 relA1 supE44 thi-1 Δ*(*lacZYA-argF*)*U*169(φ80*lacZ*ΔM15) | Laboratory stock |
| BL21 | *F- dcm ompT hsdS*(rB-mB-) *gal* (λDE3) | Laboratory stock |
| Plasmids |  |  |
| pET-28b | Kmr, T7 promoter-based expression vector | Laboratory stock |
| pGS331 | Ampr, Ptac-85 promoter-based expression vector carrying *aceF* subgenes (LD gene) | Laboratory stock |
| pNSUMO | Kmr, T7 promoter-based expression vector with C-terminal SUMO tag, two His tags, TEV protease cleavage site between the SUMO tag and the MCS | This study |
| pNLD | Kmr, SUMO tag of pNSUMO plasmid was replaced with LD tag | This study |
| pNACP | Kmr, SUMO tag of pNSUMO plasmid was replaced with ACP tag | This study |
| pNBCCP | Kmr, SUMO tag of pNSUMO plasmid was replaced with BCCP tag | This study |
| pNGB1 | Kmr, SUMO tag of pNSUMO plasmid was replaced with GB1 tag | This study |
| pNFh8 | Kmr, SUMO tag of pNSUMO plasmid was replaced with Fh8 tag | This study |
| pNSmbP | Kmr, SUMO tag of pNSUMO plasmid was replaced with SmbP tag | This study |
| pNTolA | Kmr, SUMO tag of pNSUMO plasmid was replaced with TolA tag | This study |
| pNTrxA | Kmr, SUMO tag of pNSUMO plasmid was replaced with TrxA tag | This study |
| pET-28b-*egfp* | Kmr, pET-28b plasmid carrying *egfp* gene | [17] |
| pNSUMO-*egfp* | Kmr, pNSUMO plasmid carrying *egfp* gene | This study |
| pNLD-*egfp* | Kmr, pNLD plasmid carrying *egfp* gene | This study |
| pNACP-*egfp* | Kmr, pNACP plasmid carrying *egfp* gene | This study |
| pNBCCP-*egfp* | Kmr, pNBCCP plasmid carrying *egfp* gene | This study |
| pNGB1-*egfp* | Kmr, pNGB1 plasmid carrying *egfp* gene | This study |
| pNFh8-*egfp* | Kmr, pNFh8 plasmid carrying *egfp* gene | This study |
| pNSmbP-*egfp* | Kmr, pNSmbP plasmid carrying *egfp* gene | This study |
| pNTolA-*egfp* | Kmr, pNTolA plasmid carrying *egfp* gene | This study |
| pNTrxA-*egfp* | Kmr, pNTrxA plasmid carrying *egfp* gene | This study |
| pET-28b-*EcfabG* | Kmr, pET-28b plasmid carrying *EcfabG* gene | Laboratory stock |
| pNSUMO-*EcfabG* | Kmr, pNSUMO plasmid carrying *EcfabG* gene | This study |
| pNLD-*EcfabG* | Kmr, pNLD plasmid carrying *EcfabG* gene | This study |
| pNACP-*EcfabG* | Kmr, pNACP plasmid carrying *EcfabG* gene | This study |
| pNBCCP-*EcfabG* | Kmr, pNBCCP plasmid carrying *EcfabG* gene | This study |
| pNGB1-*EcfabG* | Kmr, pNGB1 plasmid carrying *EcfabG* gene | This study |
| pNFh8-*EcfabG* | Kmr, pNFh8 plasmid carrying *EcfabG* gene | This study |
| pNSmbP-*EcfabG* | Kmr, pNSmbP plasmid carrying *EcfabG* gene | This study |
| pNTolA-*EcfabG* | Kmr, pNTolA plasmid carrying *EcfabG* gene | This study |
| pNTrxA-*EcfabG* | Kmr, pNTrxA plasmid carrying *EcfabG* gene | This study |
| pET-28b-*XccXanA2* | Kmr, pET-28b plasmid carrying *XccXanA2* gene | This study |
| pNSUMO-*XccXanA2* | Kmr, pNSUMO plasmid carrying*XccXanA2* gene | This study |
| pNLD-*XccXanA2* | Kmr, pNLD plasmid carrying *XccXanA2* gene | This study |
| pNACP-*XccXanA2* | Kmr, pNACP plasmid carrying *XccXanA2* gene | This study |
| pNBCCP-*XccXanA2* | Kmr, pNBCCP plasmid carrying *XccXanA2* gene | This study |
| pNGB1-*XccXanA2* | Kmr, pNGB1 plasmid carrying *XccXanA2* gene | This study |
| pNFh8-*XccXanA2* | Kmr, pNFh8 plasmid carrying *XccXanA2* gene | This study |
| pNSmbP-*XccXanA2* | Kmr, pNSmbP plasmid carrying *XccXanA2* gene | This study |
| pNTolA-*XccXanA2* | Kmr, pNTolA plasmid carrying *XccXanA2* gene | This study |
| pNTrxA-*XccXanA2* | Kmr, pNTrxA plasmid carrying *XccXanA2* gene | This study |
| pET-28b-*XccXanL* | Kmr, pET-28b plasmid carrying *XccXanL* gene | This study |
| pNSUMO-*XccXanL* | Kmr, pNSUMO plasmid carrying *XccXanL* gene | This study |
| pNLD-*XccXanL* | Kmr, pNLD plasmid carrying *XccXanL* gene | This study |
| pNACP-*XccXanL* | Kmr, pNACP plasmid carrying *XccXanL* gene | This study |
| pNBCCP-*XccXanL* | Kmr, pNBCCP plasmid carrying *XccXanL* gene | This study |
| pNGB1-*XccXanL* | Kmr, pNGB1 plasmid carrying *XccXanL* gene | This study |
| pNFh8-*XccXanL* | Kmr, pNFh8 plasmid carrying *XccXanL* gene | This study |
| pNSmbP-*XccXanL* | Kmr, pNSmbP plasmid carrying *XccXanL* gene | This study |
| pNTolA-*XccXanL* | Kmr, pNTolA plasmid carrying *XccXanL* gene | This study |
| pNTrxA-*XccXanL* | Kmr, pNTrxA plasmid carrying *XccXanL* gene | This study |

(1)Kmr, resistant to kanamycin. Ampr, resistant to ampicillin.
